# Supplementary material for: Functional group based marine ecosystem assessment for the Bay of Biscay via elasticity analysis
Source: PeerJ journal article supplement (doi:10.7717/peerj.7422), 2019-08-09

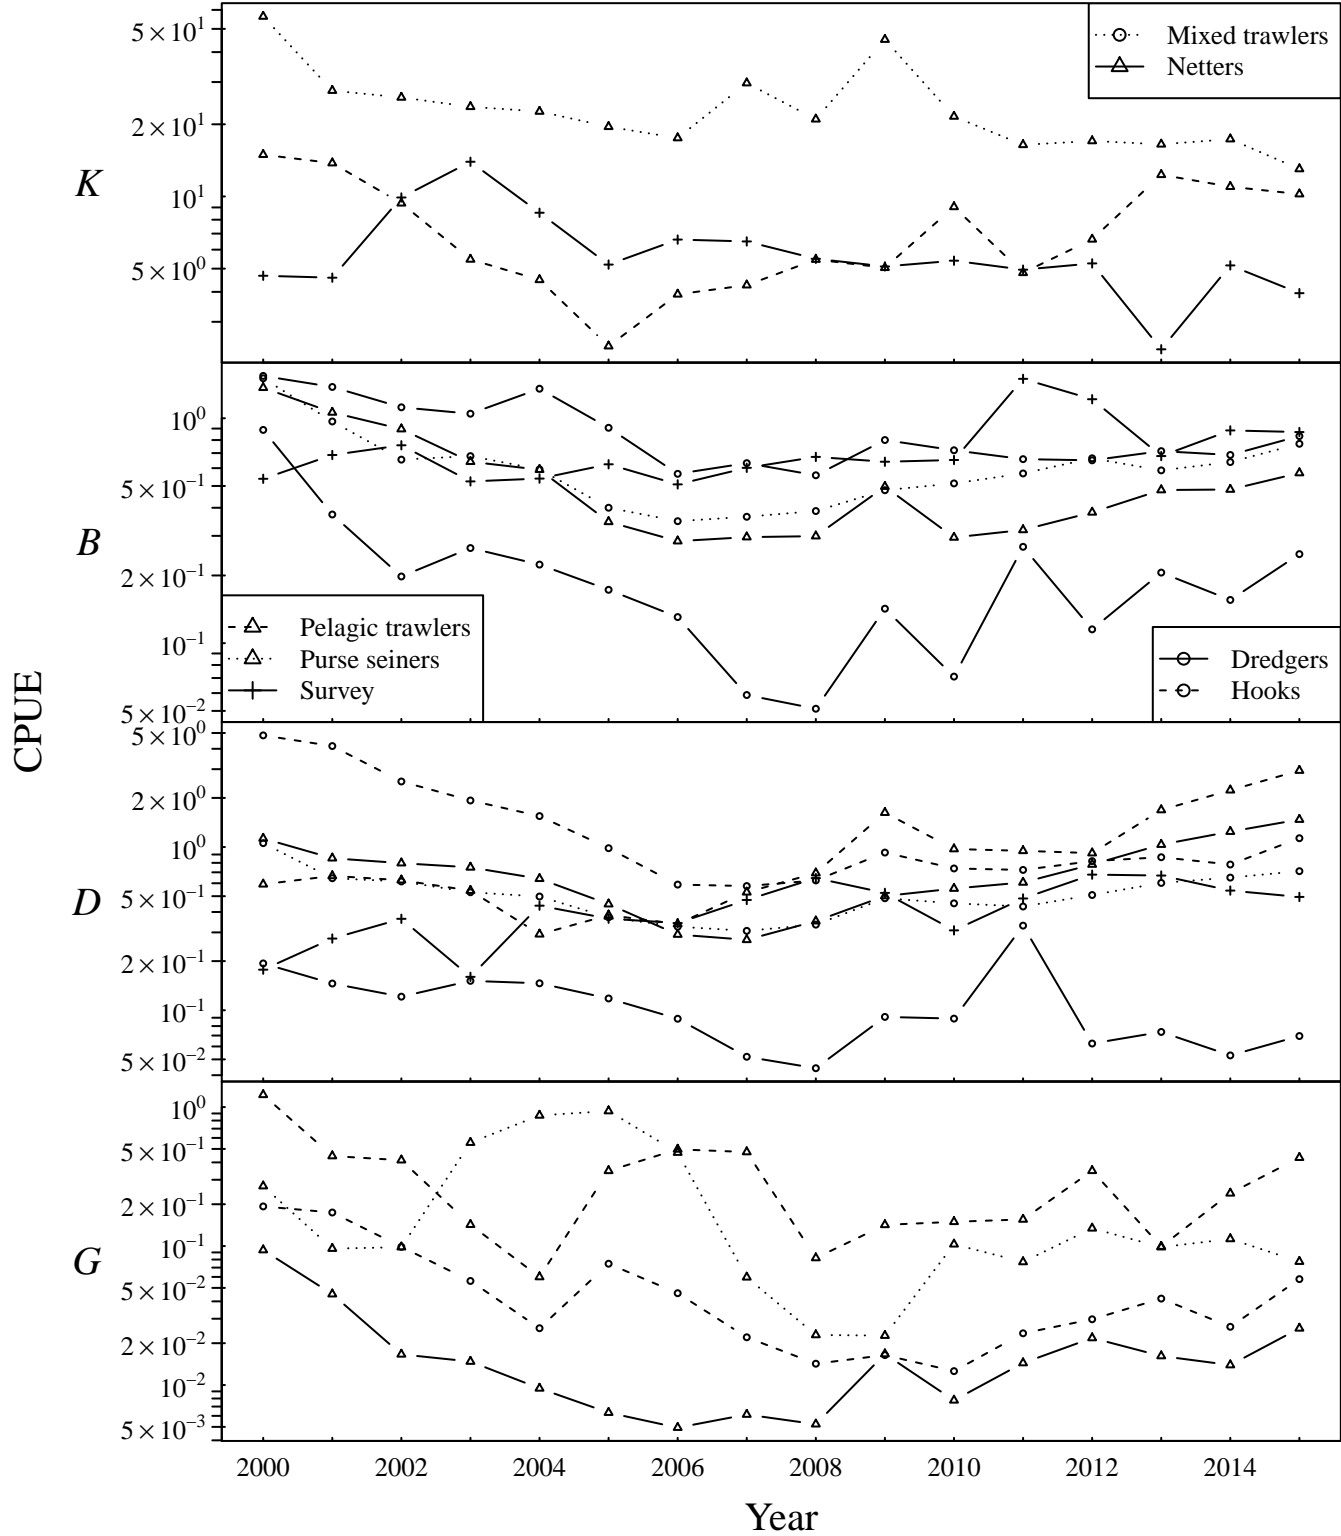

Supplement: cpue.pdf [file cpue.pdf]
